# Supplementary material for: Water-stable perovskite CsPb2Br5/CdSe quantum dot-based photoelectrochemical sensors for the sensitive determination of dopamine
Source: Royal Society of Chemistry journal article supplement (doi:10.1039/d3nr05024f), 2024-01-01
Supplement: d3nr05024f1.pdf [file d3nr05024f1.pdf]

# Electronic Supplementary Information

## Water-Stable Perovskite CsPb<sub>2</sub>Br<sub>5</sub>/CdSe Quantum Dots Based Photoelectrochemical Sensors for the Sensitive Determination of Dopamine

Gang Zhao, Xinhang Sun, Songyuan Li, Jiale Zheng, Junhui Liu\*, and Mingju Huang\*

Henan Joint International Research Laboratory of New Energy Materials and Devices,  
School of Physics and Electronics, Henan University, Kaifeng 475004, China

\* Corresponding author.

E-mail addresses: [liujh@henu.edu.cn](mailto:liujh@henu.edu.cn) (J. Liu), [hmingju@163.com](mailto:hmingju@163.com) (M. Huang).

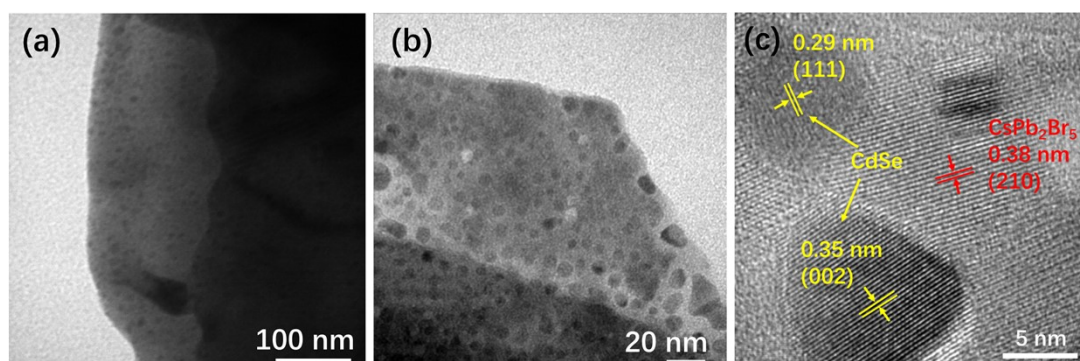

**Figure S1:** (a-c) The TEM image of the CsPb<sub>2</sub>Br<sub>5</sub>/CdSe heterojunction.

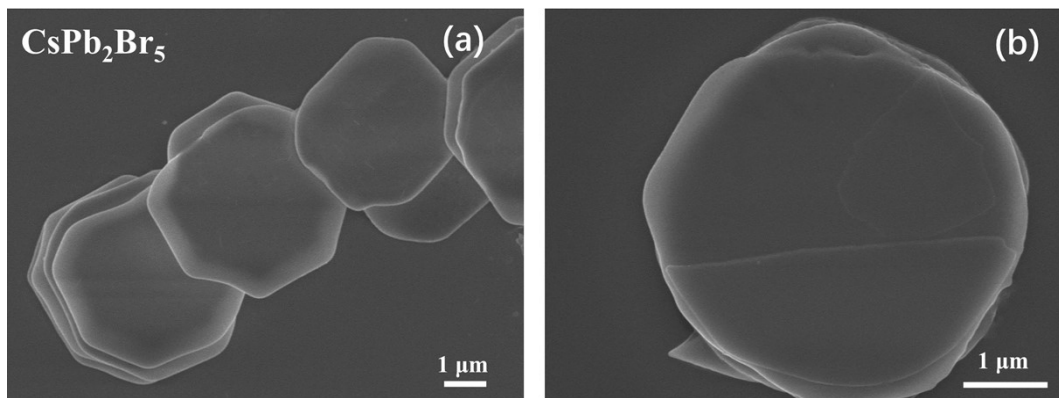

**Figure S2:** (a-b) The SEM image of the perovskite CsPb<sub>2</sub>Br<sub>5</sub>.

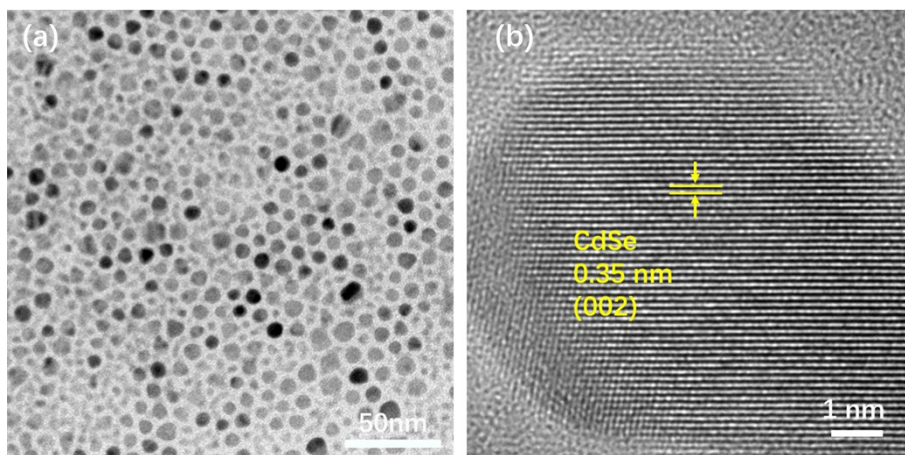

**Figure S3:** (a-b) The TEM image of CdSe quantum dots.

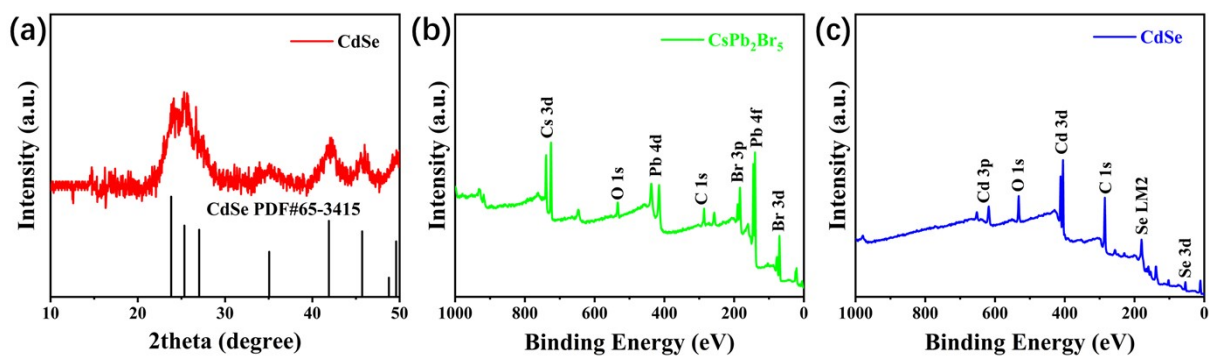

**Figure S4:** (a) XRD pattern of CdSe. X-ray Photoelectron Spectroscopy (XPS) spectrum of (b) CsPb<sub>2</sub>Br<sub>5</sub> and (c) CdSe.

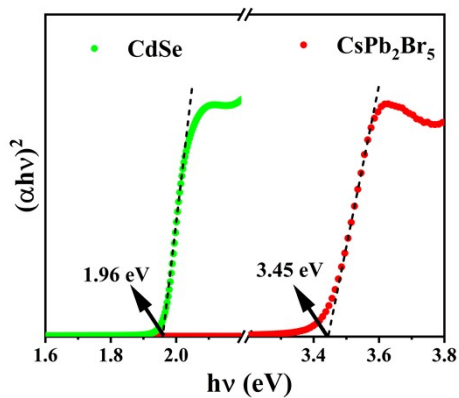

**Figure S5:** Tauc plots for CsPb<sub>2</sub>Br<sub>5</sub> and CdSe to determine their optical band gaps.

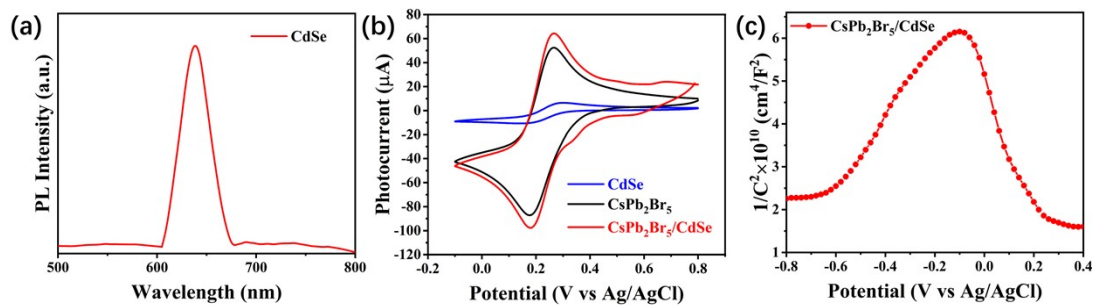

**Figure S6:** (a) PL spectrum of CdSe. (b) Cyclic voltammograms (CV) of CdSe, CsPb<sub>2</sub>Br<sub>5</sub>, and CsPb<sub>2</sub>Br<sub>5</sub>/CdSe in 0.1 M KCl solution containing 0.5 mM [Fe(CN)<sub>6</sub>]<sup>3-/4-</sup>. (c) Mott-Schottky plot of the CsPb<sub>2</sub>Br<sub>5</sub>/CdSe heterostructures.

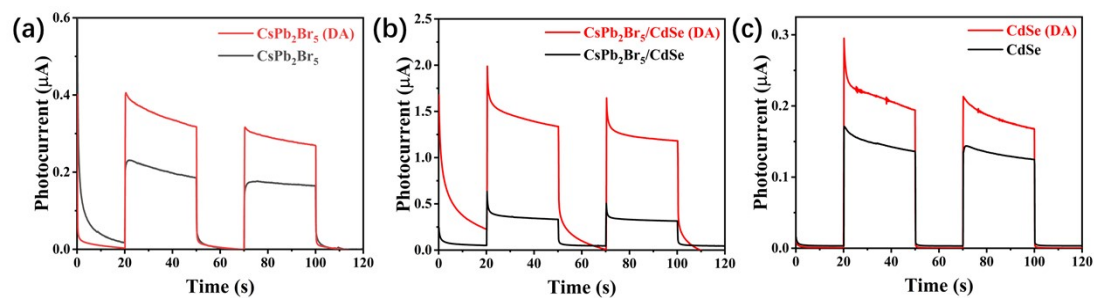

**Figure S7:** In the presence or absence of dopamine, the photocurrent responses of (a) CsPb<sub>2</sub>Br<sub>5</sub>, (b) CsPb<sub>2</sub>Br<sub>5</sub>/CdSe, and (c) CdSe were measured in PBS solution.

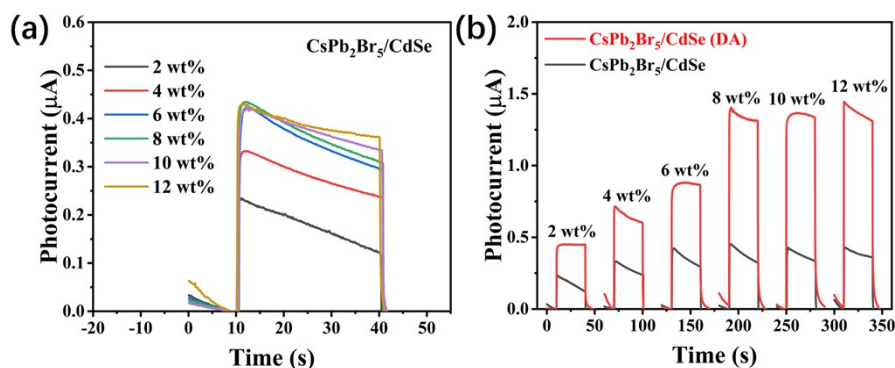

**Figure S8:** (a) Photocurrent responses of CsPb<sub>2</sub>Br<sub>5</sub>/CdSe heterojunctions with CdSe mass fractions of 2 wt%, 4 wt%, 6 wt%, 8 wt%, 10 wt%, and 12 wt%. (b) Photocurrent responses of a series of CsPb<sub>2</sub>Br<sub>5</sub>/CdSe sensors in PBS with or without dopamine.

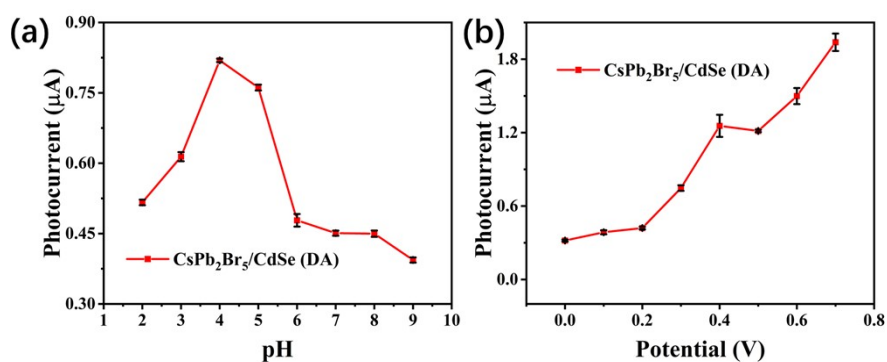

**Figure S9:** The electrode modified with CsPb<sub>2</sub>Br<sub>5</sub>/CdSe was tested in PBS solution containing dopamine to investigate the effects of (a) pH and (b) applied bias voltage.

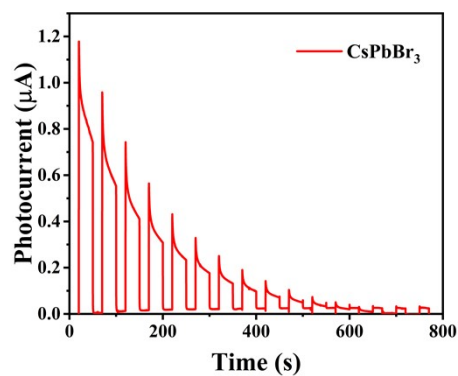

**Figure S10:** Photocurrent response of the CsPbBr<sub>3</sub> photoelectrode.

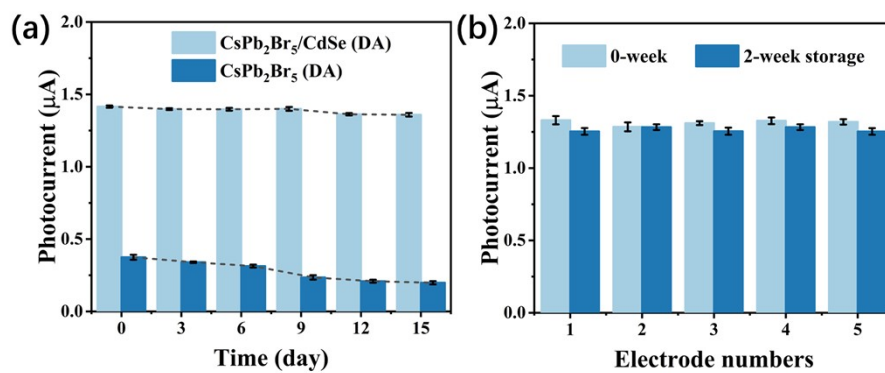

**Figure S11:** (a) Photocurrent evolutions of the CsPb<sub>2</sub>Br<sub>5</sub>/CdSe and CsPb<sub>2</sub>Br<sub>5</sub> sensors stored for 15 days. (b) PEC response of the CsPb<sub>2</sub>Br<sub>5</sub>/CdSe sensors for 2-weeks storage.

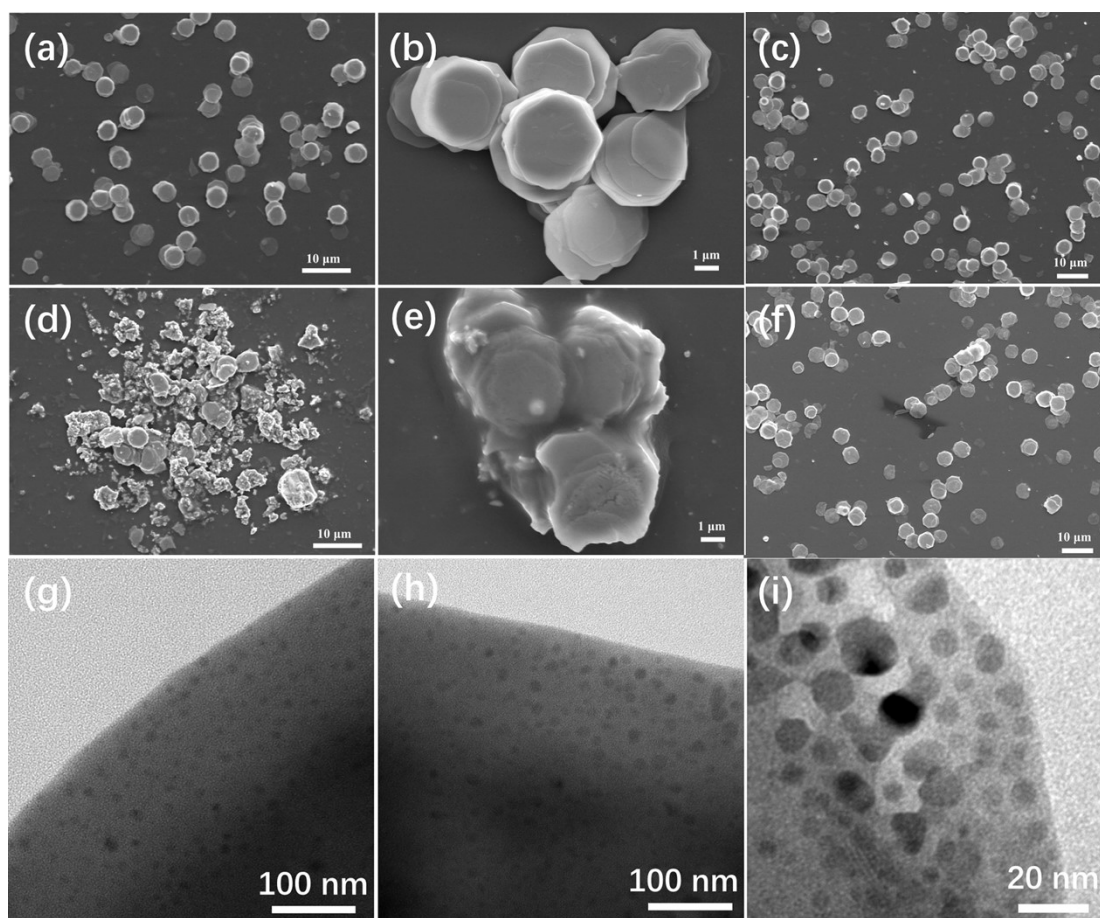

**Figure S12:** The SEM image of the perovskite CsPb<sub>2</sub>Br<sub>5</sub> (a-b) before and (d-e) after staying in DA aqueous solution. The SEM images of the CsPb<sub>2</sub>Br<sub>5</sub>/CdSe heterojunction (c) before and (f) after staying in DA aqueous solution. (g-i) The TEM images of the CsPb<sub>2</sub>Br<sub>5</sub>/CdSe heterojunction after exposure to the DA environment.



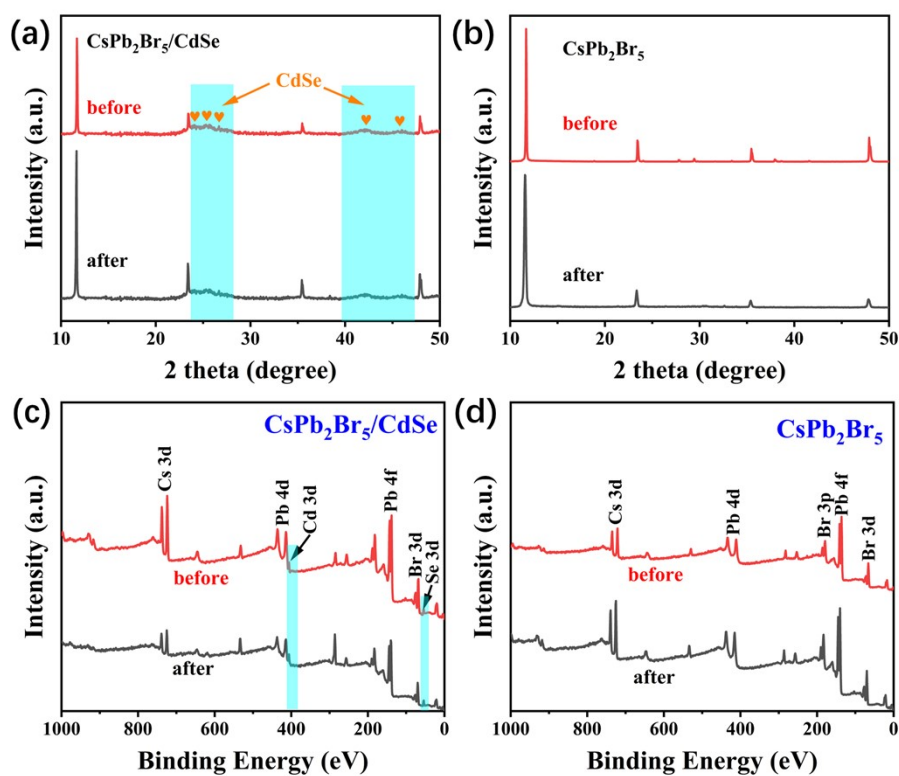

**Figure S13:** XRD pattern of (a) the CsPb<sub>2</sub>Br<sub>5</sub>/CdSe heterojunction and (b) the perovskite CsPb<sub>2</sub>Br<sub>5</sub> before/after staying in DA aqueous solution. XPS spectrum of (c) the CsPb<sub>2</sub>Br<sub>5</sub>/CdSe heterojunction and (d) the perovskite CsPb<sub>2</sub>Br<sub>5</sub> before/after exposure to the DA environment.

**Table S1:** Comparison of different sensors for dopamine detection.

| Method | Linear range ( $\mu\text{M}$ ) | LOD ( $\mu\text{M}$ ) | References |
|--------|--------------------------------|-----------------------|------------|
| PEC    | 0.1-250                        | 0.012                 | 1          |
| PEC    | 0.3-750                        | 0.022                 | 2          |
| PEC    | 5-200 and 200-5000             | 2                     | 3          |
| PEC    | 0.05-20                        | 0.016                 | 4          |
| PEC    | 0.5-20 and 20-4000             | 0.15                  | 5          |
| DPV    | 1-200                          | 0.6                   | 6          |
| DPV    | 1-500                          | 0.22                  | 2          |
| DPV    | 0.5-78                         | 0.11                  | 7          |
| CV     | 0-2000                         | 4.7                   | 8          |
| CV     | 1-90 and 110-350               | 0.03                  | 9          |
| CV     | 0.05-35                        | 0.04                  | 10         |
| PL     | 0-340                          | 3.6                   | 11         |
| PL     | 10-200 and 500-5000            | 0.022                 | 12         |
| PL     | 0.1-50                         | 0.01                  | 13         |
| SWV    | 0.001-1000                     | 0.00033               | 14         |
| SWV    | 10-180                         | 25.4                  | 15         |
| SWV    | 62.5-603                       | 33.3                  | 16         |
| PEC    | 0.4-303.9                      | 0.0124                | This work  |

**Table S2:** Detection of dopamine in human serum by CsPb<sub>2</sub>Br<sub>5</sub>/CdSe sensor.

| No. | Added ( $\mu\text{M}$ ) | Found ( $\mu\text{M}$ ) | Recovery (%) | RSD (% , n=3) |
|-----|-------------------------|-------------------------|--------------|---------------|
| 1   | 1                       | 0.92                    | 92.0         | 2.3           |
| 2   | 5                       | 4.69                    | 93.8         | 1.6           |
| 3   | 20                      | 20.62                   | 103.1        | 3.0           |
| 4   | 50                      | 47.52                   | 95.04        | 3.6           |
| 5   | 200                     | 200.9                   | 100.45       | 1.3           |

## References

1. X. Chen, D. Li, G. Pan, D. Zhou, W. Xu, J. Zhu, H. Wang, C. Chen and H. Song, *Nanoscale*, 2018, **10**, 10505-10513.
2. N. Ahmadi, M. Bagherzadeh and A. Nemati, *Biosensors and Bioelectronics*, 2020, **151**.
3. P. Gao, H. Ma, J. Yang, D. Wu, Y. Zhang, B. Du, D. Fan and Q. Wei, *New Journal of Chemistry*, 2015, **39**, 1483-1487.
4. C. Qin, X. Bai, Y. Zhang and K. Gao, *Mikrochim Acta*, 2018, **185**, 278.
5. J. Qiao, Y. Wang, S. Dong, Q. Liang and S. Shao, *ACS Applied Nano Materials*, 2023, **6**, 5664-5674.
6. X. Ji, X. Zhao, Z. Zhang, Y. Si, W. Qian, H. Fu, Z. Chen, Z. Wang, H. Jin, Z. Yang and D. He, *Nano Research*, 2023, **16**, 6361-6368.
7. C. Li, Y. Cai, J. Hu, J. Liu, H. Dai, Q. Xu, C. Zhang, X. Zhang, K. Liu, M. L. Kosinova, T. Goto, R. Tu and S. Zhang, *ACS Applied Materials & Interfaces*, 2023, **15**, 27399-27410.
8. S. Paulo-Mirasol, C. Izquierdo, C. Alemán, E. Armelin and J. Torras, *Applied Surface Science*, 2023, **626**, 157241.
9. M. Hasheena, A. Ratnamala, M. Noorjahan, G. D. Reddy, K. Shiprath, H. Manjunatha and K. C. B. Naidu, *Applied Physics A*, 2022, **128**.
10. Y. Shoja, N. Isoaho, V. Jokinen and S. Franssila, *Applied Surface Science*, 2022, **573**, 151444.
11. M. Chatterjee, P. Nath, S. Kadian, A. Kumar, V. Kumar, P. Roy, G. Manik and S. Satapathi, *Scientific Reports*, 2022, **12**.
12. H. Zakaria, R. El Kurdi and D. Patra, *RSC Advances*, 2022, **12**, 28245-28253.
13. Q. Wang, K. Zheng, W. Zhang and M.-J. Li, *Journal of Inorganic Biochemistry*, 2022, **234**, 111902.
14. A. B. Urgunde, A. Dhamija and R. Gupta, *Chemistry – An Asian Journal*, 2021, **17**.
15. S. E. Elugoke, O. E. Fayemi, A. S. Adekunle, B. B. Mamba, T. T. I. Nkambule and E. E. Ebenso, *FlatChem*, 2022, **33**, 100372.
16. H. N. Yu, Y. C. Pang and J. Y. Tang, *International Journal of Electrochemical Science*, 2015, **10**, 8353-8360.
